# Supplementary material for: Effect of the co-sensitization sequence on the performance of dye-sensitized solar cells with porphyrin and organic dyes
Source: Royal Society of Chemistry journal article supplement (doi:10.1039/c5cp05986k), 2015-11-27
Supplement: c5cp05986k1.pdf [file c5cp05986k1.pdf]

**Electronic Supplementary Information (ESI) for**

**Effect of Co-Sensitization Sequence on the Performance of Dye-  
Sensitized Solar Cells with Porphyrin and Organic Dyes**

Suhua Fan,<sup>a,b</sup> Xuefeng Lu,<sup>a</sup> Hong Sun,<sup>a</sup> Gang Zhou,<sup>a</sup> Yuan Jay Chang<sup>c</sup> and Zhong-Sheng Wang<sup>a\*</sup>

<sup>a</sup> Department of Chemistry, Lab of Advanced Materials, Collaborative Innovation Center of Chemistry for Energy Materials, Fudan University, Shanghai 200438, P. R. China.

<sup>b</sup> School of Chemistry & Material Engineering, Fuyang Normal College, Fuyang, Anhui 236037, P. R. China.

<sup>c</sup> Department of Chemistry, Tung Hai University, NO. 1727, Sec.4, Taiwan Boulevard, Xitun District, Taichung, Taiwan 40704, P. R. China.

\*Corresponding author, E-mail: [zs.wang@fudan.edu.cn](mailto:zs.wang@fudan.edu.cn)

**Table S1.** Fluorescence lifetimes of **FNE57**, **FNE59** and **FNE46** in a THF solution and adsorbed on a nanocrystalline TiO<sub>2</sub> film, respectively.

| Dye                                                     | Lifetime/ns |
|---------------------------------------------------------|-------------|
| <b>FNE57</b> in THF solution / on TiO <sub>2</sub> film | 1.08 / 0.18 |
| <b>FNE59</b> in THF solution / on TiO <sub>2</sub> film | 0.96 / 0.18 |
| <b>FNE46</b> in THF solution / on TiO <sub>2</sub> film | 0.45 / 0.29 |

**Table S2.** Photovoltaic parameters of the cocktail-type DSSCs fabricated with the sensitizers FNE46 and FNE59 with different molar ratios

| Molar ratio of FNE46/FNE59 | $V_{oc}$ /mV | $J_{sc}$ /mA cm <sup>-2</sup> | $FF$        | $PCE$ /%    |
|----------------------------|--------------|-------------------------------|-------------|-------------|
| 1/0                        | 661 ± 3      | 15.99 ± 0.21                  | 0.65 ± 0.02 | 6.87 ± 0.05 |
| 3.5/1                      | 671 ± 6      | 16.32 ± 0.15                  | 0.69 ± 0.01 | 7.56 ± 0.11 |
| 2/1                        | 679 ± 5      | 16.06 ± 0.27                  | 0.68 ± 0.01 | 7.42 ± 0.08 |
| 1/1                        | 679 ± 4      | 15.24 ± 0.18                  | 0.70 ± 0.01 | 7.24 ± 0.09 |
| 0/1                        | 703 ± 8      | 12.06 ± 0.22                  | 0.71 ± 0.01 | 6.02 ± 0.12 |

**Table S3.** Absorbed amounts of dye molecules on TiO<sub>2</sub> dipped in various dye baths

| Dye                                                       | Adsorbed amount of porphyrin (mol cm <sup>-2</sup> ) | Adsorbed amount of organic dye (mol cm <sup>-2</sup> ) | Total adsorbed amount (mol cm <sup>-2</sup> ) |
|-----------------------------------------------------------|------------------------------------------------------|--------------------------------------------------------|-----------------------------------------------|
| 18 h in <b>FNE57</b>                                      | $1.48 \times 10^{-7}$                                | /                                                      | $1.48 \times 10^{-7}$                         |
| 18 h in <b>FNE59</b>                                      | $1.23 \times 10^{-7}$                                | /                                                      | $1.23 \times 10^{-7}$                         |
| 18 h in <b>FNE46</b>                                      | /                                                    | $1.62 \times 10^{-7}$                                  | $1.62 \times 10^{-7}$                         |
| 6 h in <b>FNE57</b> + 12 h in <b>FNE46</b>                | $3.53 \times 10^{-8}$                                | $1.18 \times 10^{-7}$                                  | $1.53 \times 10^{-7}$                         |
| <b>A</b> (6 h in <b>FNE59</b> + 12 h in <b>FNE46</b> )    | $2.77 \times 10^{-8}$                                | $1.13 \times 10^{-7}$                                  | $1.41 \times 10^{-7}$                         |
| <b>B</b> (12 h in <b>FNE46</b> + 6 h in <b>FNE59</b> )    | $1.96 \times 10^{-8}$                                | $1.19 \times 10^{-7}$                                  | $1.39 \times 10^{-7}$                         |
| <b>C</b> [12 h in ( <b>FNE46</b> + <b>FNE59</b> , 3.5:1)] | $1.78 \times 10^{-8}$                                | $8.97 \times 10^{-8}$                                  | $1.08 \times 10^{-7}$                         |

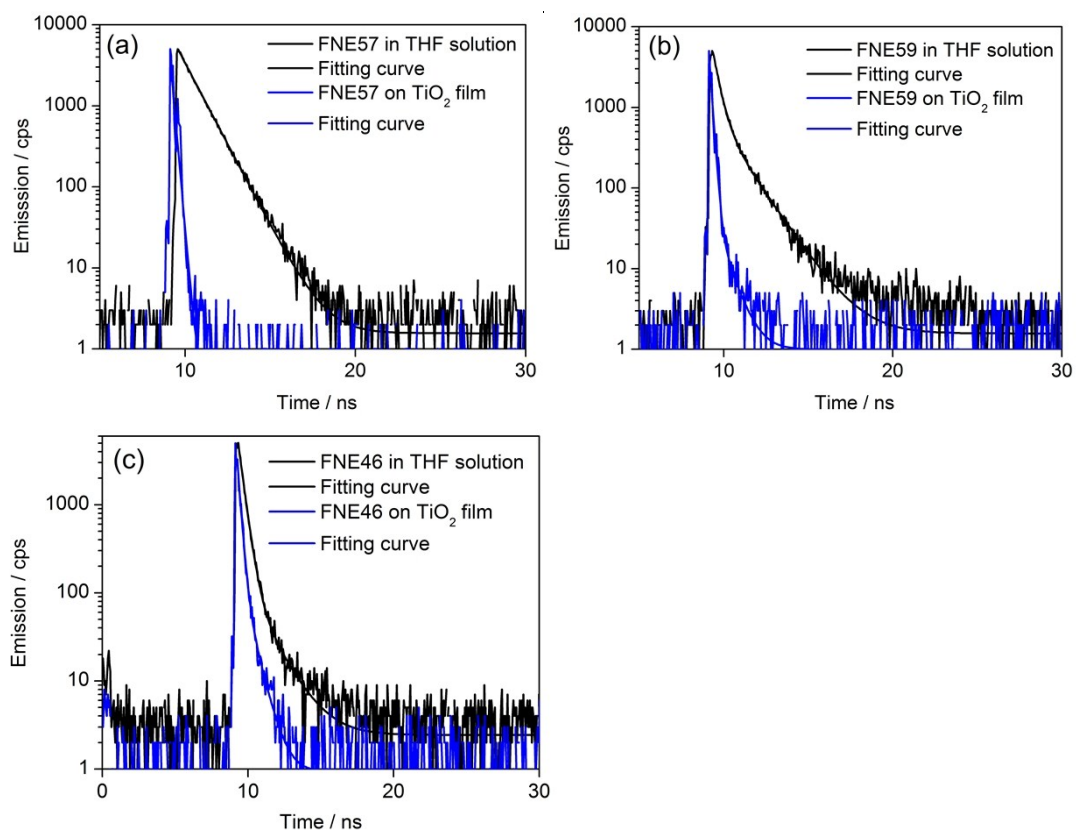

**Figure S1.** Time-resolved luminescence of FNE46, FNE57, and FNE59 in THF solution and adsorbed on a nanocrystalline  $\text{TiO}_2$  film.

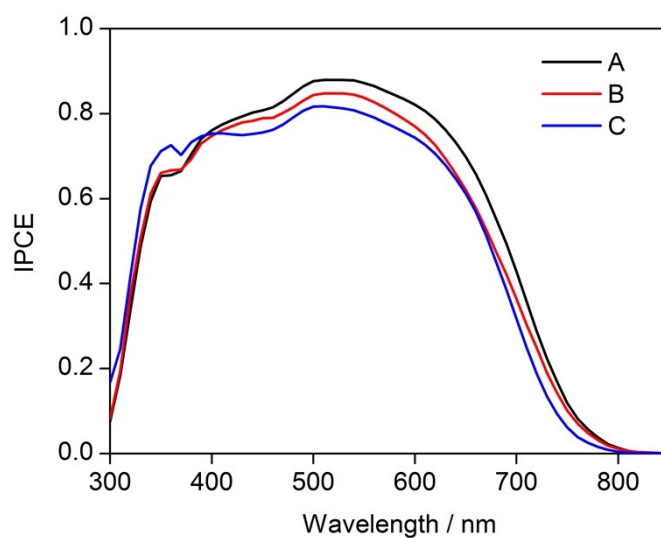

**Figure S2.** IPCE action spectra of devices **A**, **B**, and **C**.
